# Supplementary material for: Acute inflammation induced accelerated vascular remodeling by blood mononuclear cells in vitro
Source: Research Square preprint supplement (doi:10.21203/rs.3.rs-6257437/v1), 2025-03-31
Supplement: Supplementary file 1 [file e9e50aa0e80fbf348fd5a917.docx]

**Supporting information**

Acute inflammation induced accelerated vascular remodeling by blood mononuclear cells *in* *vitro*

Raghav Sonia, Manabu Shiraia, Tetsuji Yamaokab and Atsushi Maharaa*

aNational Cerebral and Cardiovascular Center Research Institute, Kishibe Shimmachi, Suita Osaka, 564-8565, Japan

bDepartment of Clinical Engineering, Komatsu University, Ishikawa, Japan

* Corresponding author

Phone: +81-06-6170-1070

Fax: +81-06-6170-1702

Email address:[mahara@ncvc.go.jp](mailto:mahara@ncvc.go.jp)


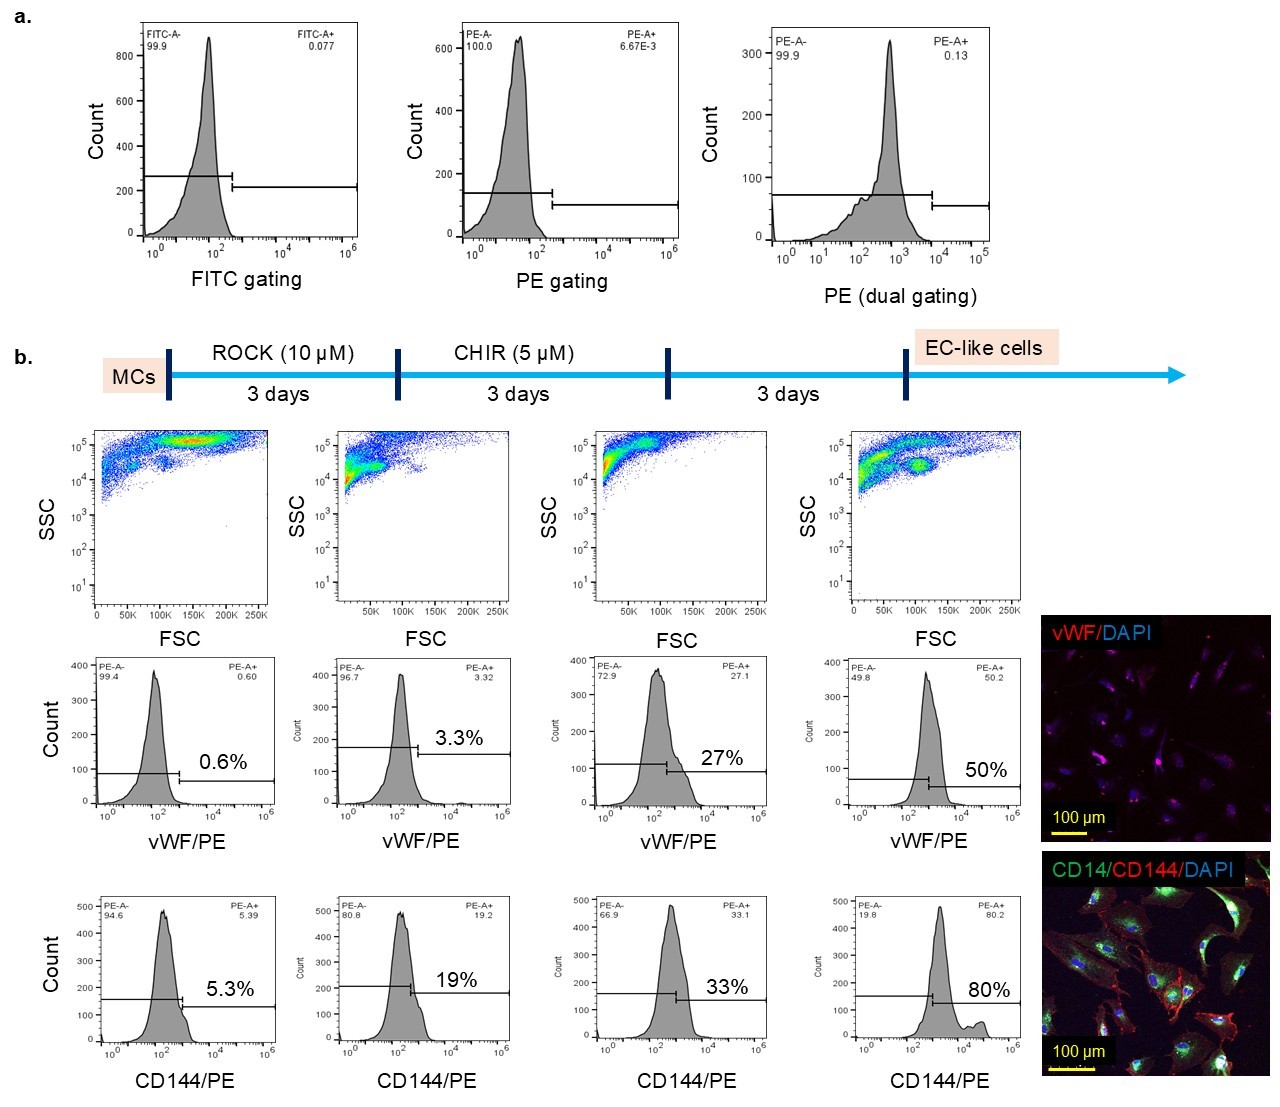


**Figure S1.** (a) FITC and PE gating were used as controls for the analysis. (b) FSC/SSC analysis and the fraction ratio (%) of vWF and CD144 positive cells were assessed at different stages of differentiation from MCs to EC-like cells.


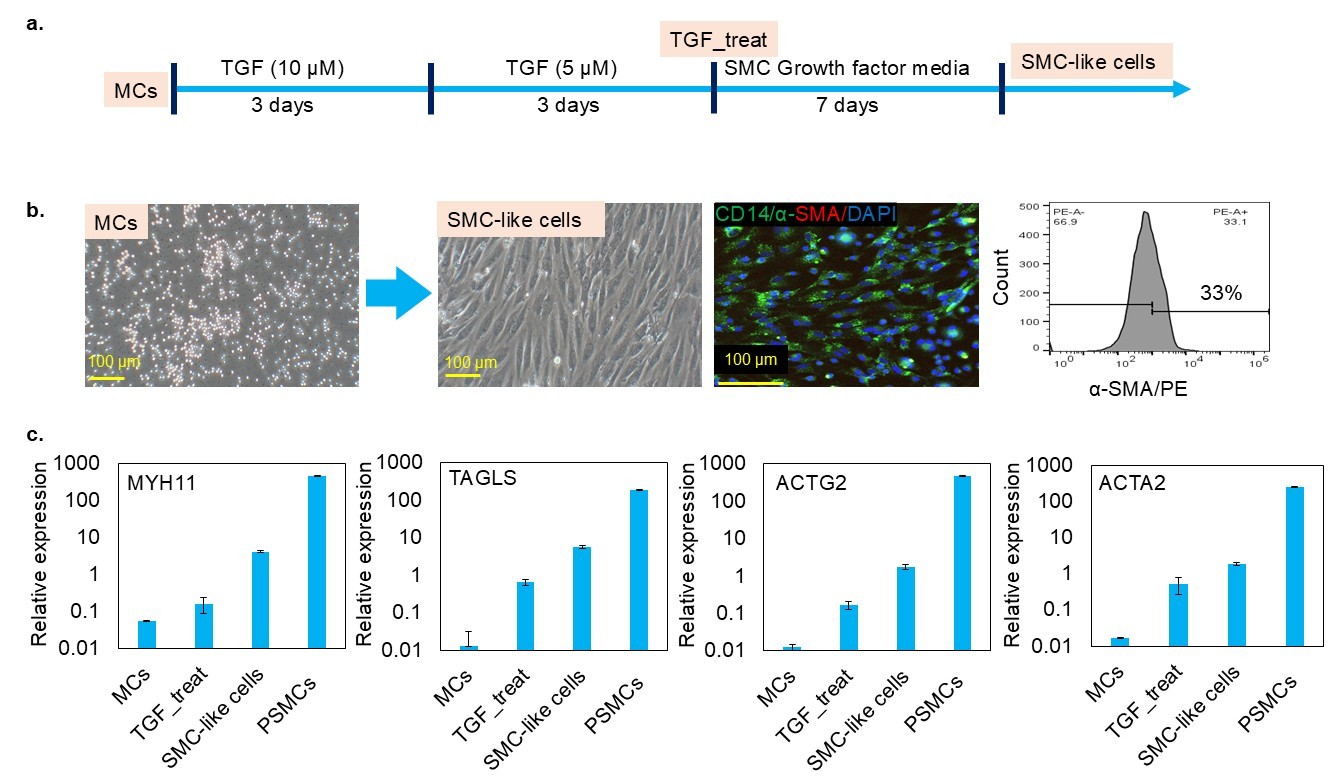


**Figure S2.** (a) protocol timeline for MCs differentiation towards SMC-like cells. (b) SMC-like cells have spindle-like morphology and 33% of cells stained positive for α-SMA. (c) SMC-specific genes are upregulated during differentiation. Pig smooth muscle cells (PSMCs) were used as a positive reference for comparison.


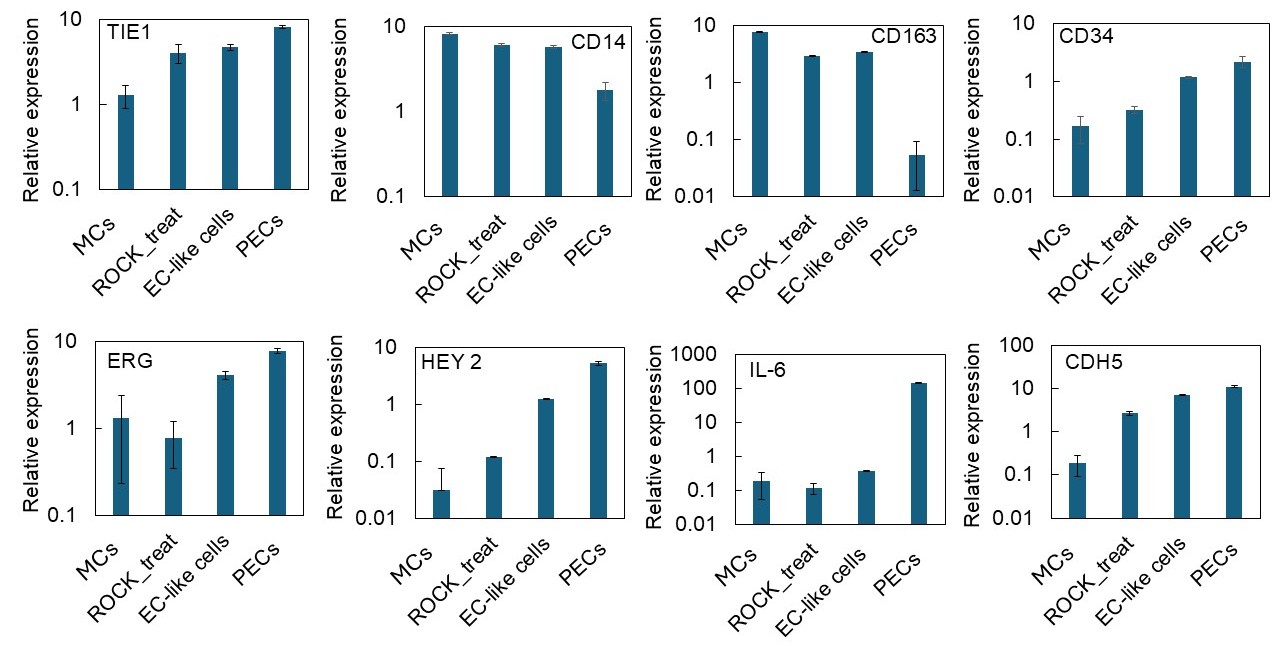


**Figure S3.** Gene expression profile during the differentiation of MCs into EC-like cells. PECs were used as a positive control in the experiment.


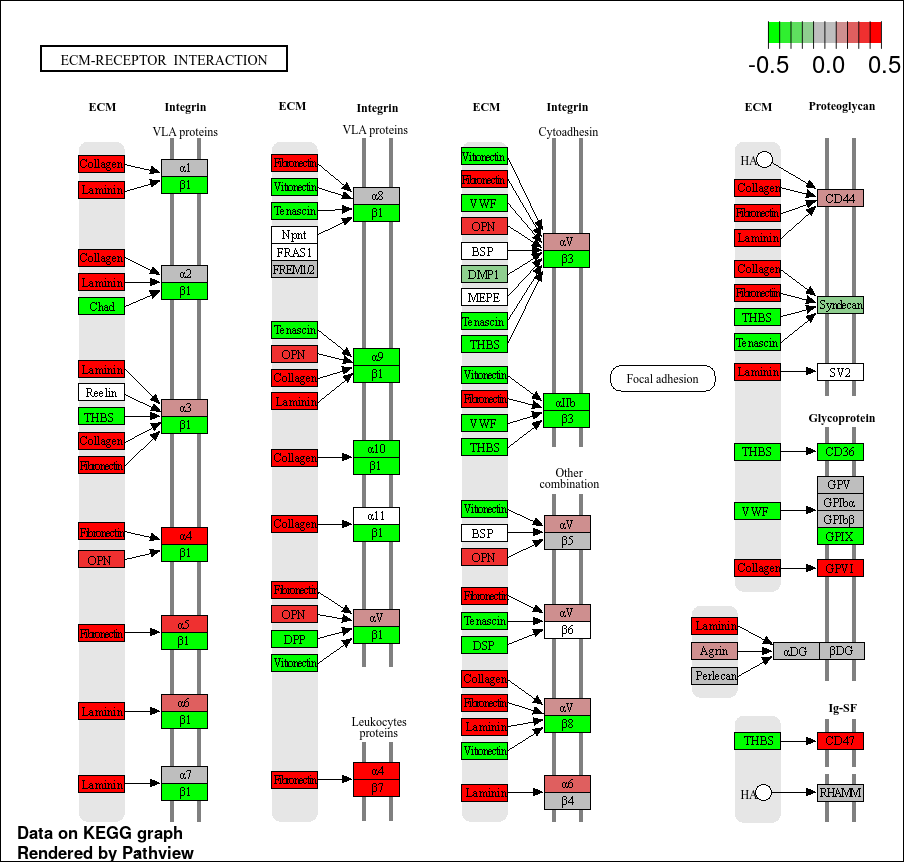


**Figure S4.** MCs collected after induction of acute inflammation have higher integrin activation for ECM interaction than pre-inflammation MCs.


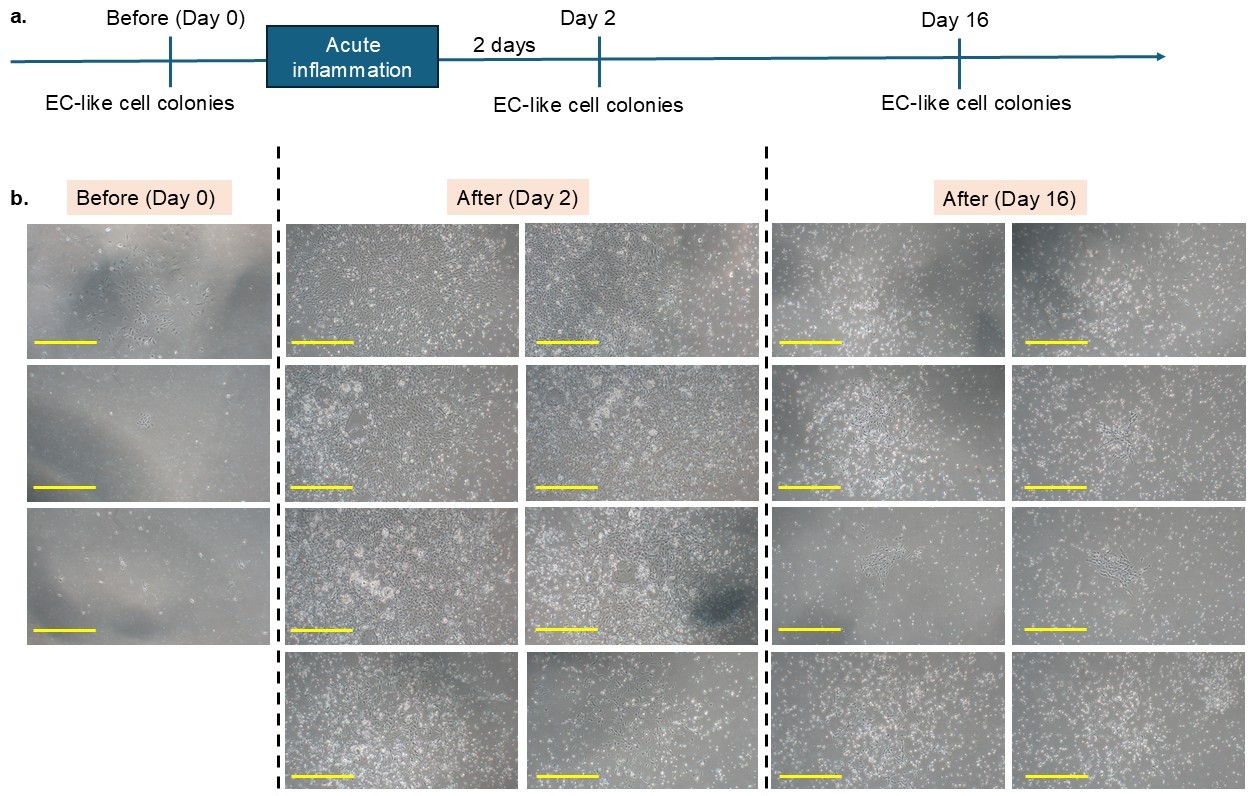


**Figure S5.** (a) The timeline for blood sample collection, before and after acute inflammation in mini-pigs, and processed for differentiation towards EC-like cells using a ROCK/CHIR protocol. (b) Phase contrast images of all EC-like cell colonies formed with the collected samples in a 10 mm Petri dish.


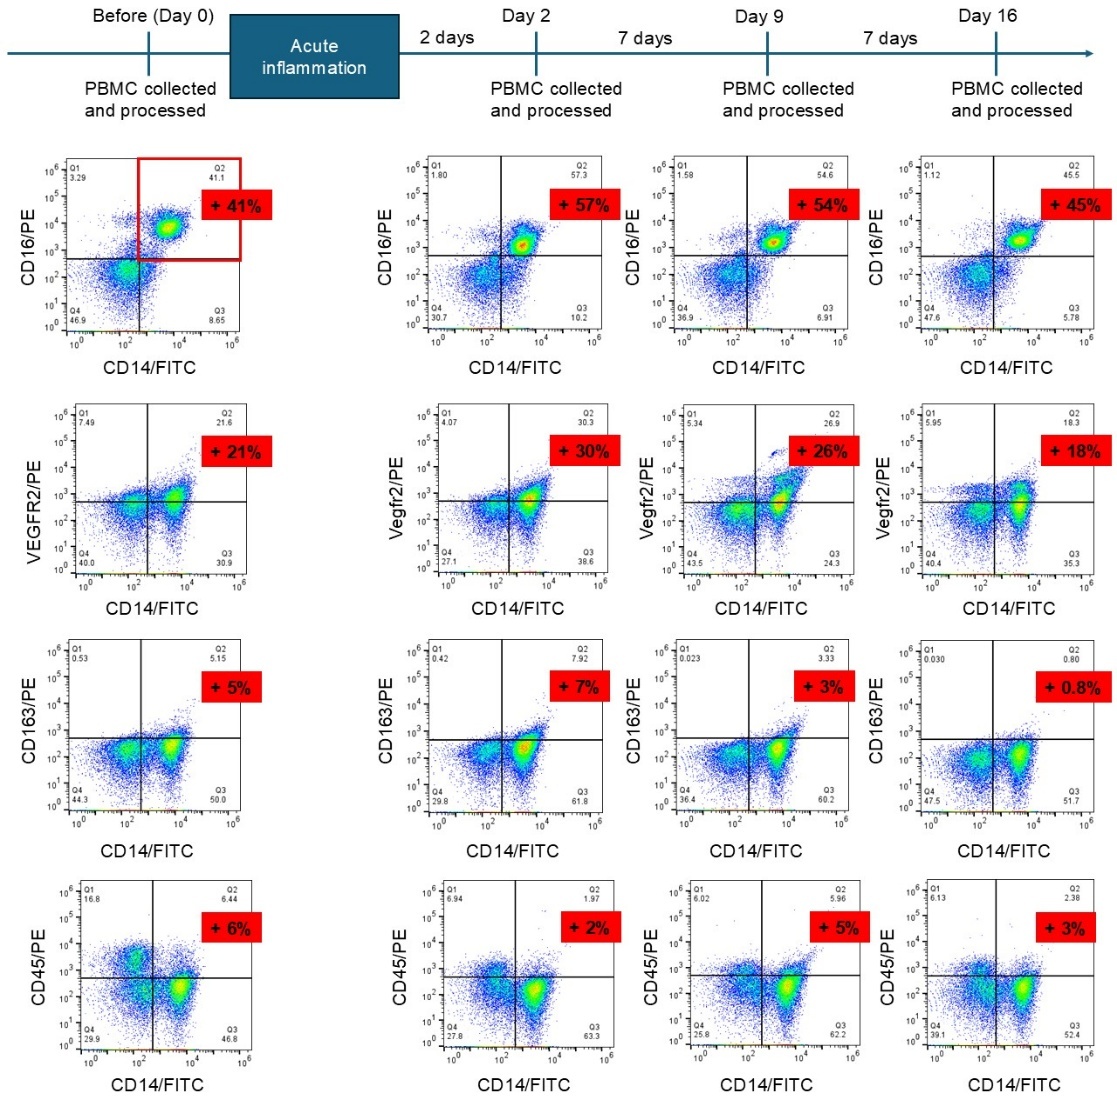

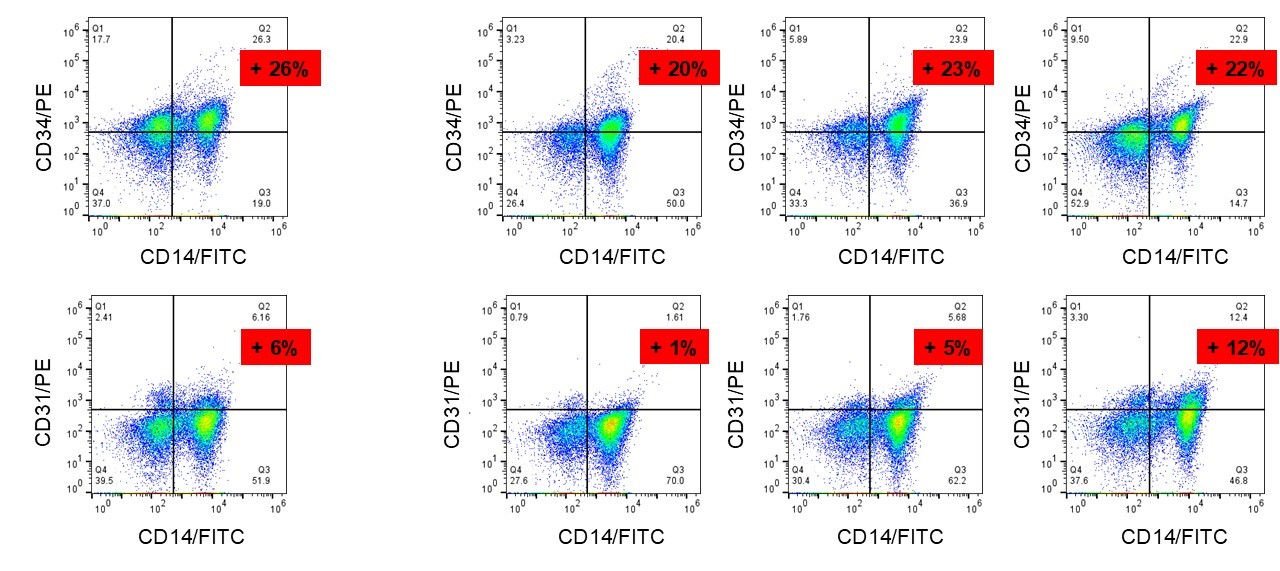


**Figure S6.** Fraction ratio (%) of CD14/CD16 positive cells in PBMCs processed from blood samples collected before and after acute inflammation as indicated in the timeline.


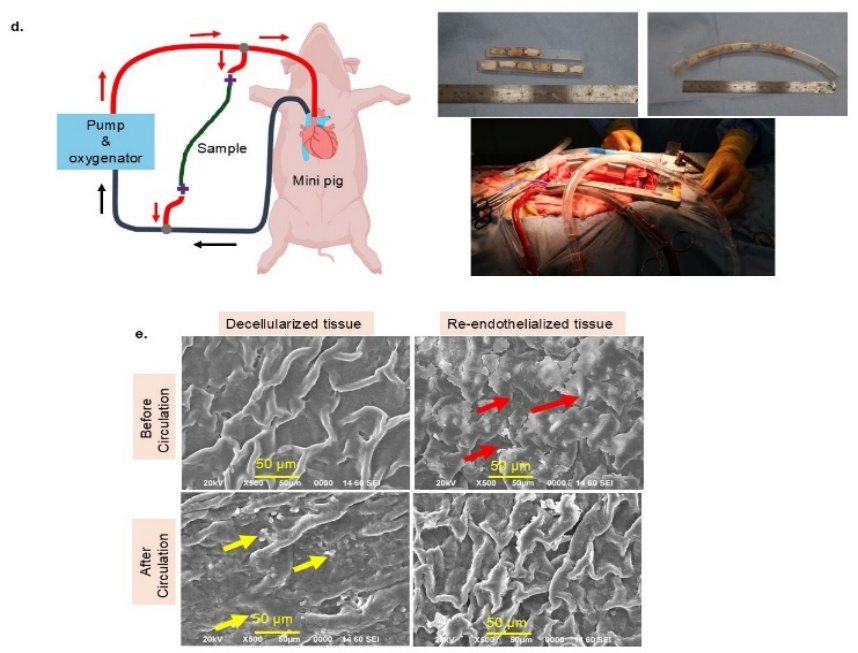

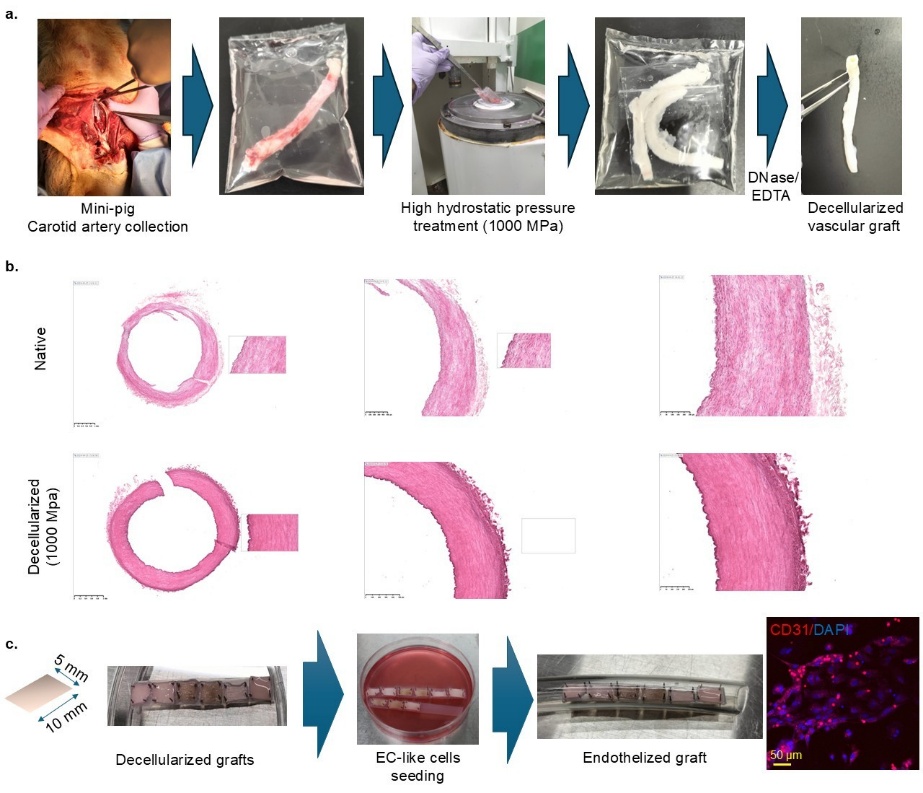


**Figure S7.** (A)Mini-pig carotid artery was collected and processed using high hydrostatic pressure treatment at 1000 MPa, then followed by DNase/EDTA washing to obtain the decellularized vascular graft. (B) H&E staining confirmed successful decellularization at 1000 MPa. (C) The decellularized vascular graft was cut into small pieces and fixed on a silicon rubber strip using needles as shown. EC-like cells seeded on decellularized grafts and incubated with CD31 stain. Images show proliferated EC-like cells on the graft lumen surface. (D) Re-endothelialized graft kept inside the tube was exposed to blood circulation for 3 hours using the cardiopulmonary bypass system as shown. (E) Surface morphology shows higher attachment of platelets (indicating by yellow arrow) on decellularized tissue; interestingly, re-endothelized tissue covered with EC-like cells (indicating by red arrow) shows lesser platelet adhesion under blood circulation.

**Table 1.** List of primers used for quantitative PCR.

| **PECs (gene)** | **Forward primers** | **Reverse primers** |
| --- | --- | --- |
| CD31 | CACCGAGGTCTGGGAACAAA | GGAGCCTTCCGTTCTAGAATATC |
| vWF | GCCTTCCTGACAAGGTGTGT | GGAGGACGTAAGTGAAGCCC |
| Ang | AGCGTGGGACTCGGATGT | CTTCCAACAAAGGCTCCTTCC |
| CD34 | GAGAAAGGCTGGGCGAAGA | GAATGGCCGTTTCTGGAGGT |
| Notch1 | CAACGTCAATGAGTGCCACA | GATCTCACAGTTGGGTCCTGT |
| Hey1 | GCAGGTAATGGAGAAAGGATCTG | CTCAGGTAACGGGCGACTTC |
| GAPDH | ACACTCACTCTTCTACCTTTG | CAAATTCATTGTCGTACCAG |

| **PSMCs (gene)** | **Forward primers** | **Reverse primers** |
| --- | --- | --- |
| MYH11 | AGTTGGAGATCTGGGACCGA | TAATGCTGGCTGCCTCGAAA |
| TAGLN | CTTCCAGGTCTGGCTGAAGAA | GGCCAGGTCTTTGCCTTCG |
| ACTG2 | TGTGACCACAGCTGAACGA | ATGGTGATGACCTGTCCGTC |
| ACTA2 | CCAGAGCAATCAGGGACC | TGTCCCATTCCCACCATCAC |
| CNN1 | GCCGTGCTATATAAGGGCCG | GGAGCTTATTGATGAACTCGCAAA |
| GAPDH | ACACTCACTCTTCTACCTTTG | CAAATTCATTGTCGTACCAG |
